# Supplementary material
Source: Springer Nature journal article supplement (https://www.springermedizin.de/resource/supplementary/12891_2001_14_MOESM3_ESM.pdf/9510336)

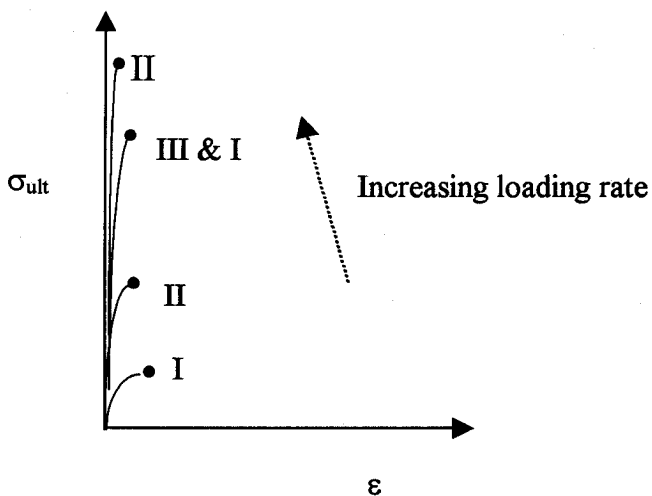

Bone

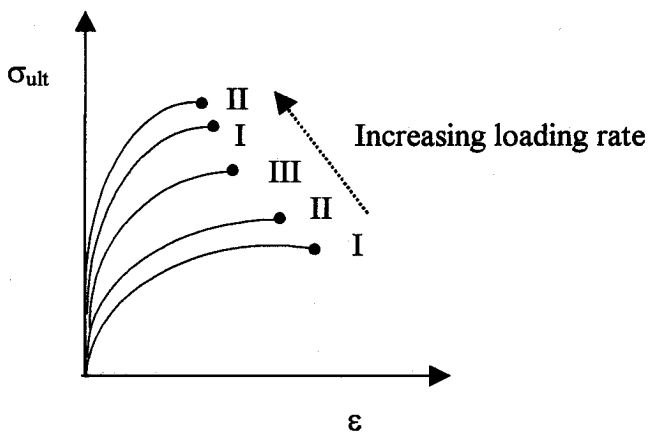

Ligament

Supplement: MOESM3 [file 9510336]
